# Supplementary material for: The extended lipid panel assay: a clinically-deployed high-throughput nuclear magnetic resonance method for the simultaneous measurement of lipids and Apolipoprotein B
Source: PubMed Central journal article supplement (PMC7709389; doi:10.1186/s12944-020-01424-2), 2020-12-01
Supplement: 12944_2020_1424_MOESM1_ESM.pdf [file 12944_2020_1424_MOESM1_ESM.pdf]

**Supplemental Table 1** Between-site reproducibility of ELP assay results

| Assay Site |      | Total Cholesterol (mg/dL) |         |       | Triglycerides (mg/dL) |           |       | HDL Cholesterol (mg/dL) |         |      | Apolipoprotein B (mg/dL) |          |       |
|------------|------|---------------------------|---------|-------|-----------------------|-----------|-------|-------------------------|---------|------|--------------------------|----------|-------|
|            |      | <200                      | 200-240 | >240  | <150                  | 150 - 200 | >200  | <40                     | 40 - 60 | >60  | <90                      | 90 - 130 | >160  |
| Site 1     | Mean | 138.4                     | 213.1   | 314.8 | 105.6                 | 170.5     | 295.7 | 35.8                    | 50.7    | 77.9 | 83.0                     | 112.5    | 162.5 |
|            | SD   | 2.6                       | 2.9     | 4.3   | 1.5                   | 1.4       | 2.3   | 1.2                     | 1.3     | 1.4  | 1.7                      | 2.3      | 2.4   |
|            | CV%  | 1.9                       | 1.4     | 1.4   | 1.4                   | 0.8       | 0.8   | 3.4                     | 2.6     | 1.9  | 2.2                      | 2.1      | 1.5   |
| Site 2     | Mean | 146.0                     | 216.5   | 320.0 | 107.1                 | 167.5     | 296.5 | 36.9                    | 54.2    | 81.5 | 90.8                     | 120.0    | 169.8 |
|            | SD   | 3.4                       | 3.2     | 4.0   | 4.8                   | 6.6       | 8.0   | 1.7                     | 1.2     | 1.6  | 3.4                      | 4.0      | 3.8   |
|            | CV%  | 2.5                       | 1.5     | 1.3   | 4.5                   | 4.1       | 2.7   | 4.9                     | 2.4     | 2.0  | 3.8                      | 3.4      | 2.3   |
| Site 3     | Mean | 140.9                     | 211.0   | 311.9 | 108.2                 | 170.8     | 296.2 | 35.3                    | 51.9    | 79.4 | 81.6                     | 112.3    | 160.6 |
|            | SD   | 4.0                       | 4.5     | 6.4   | 1.7                   | 3.0       | 5.3   | 1.4                     | 1.2     | 1.4  | 2.8                      | 2.7      | 3.9   |
|            | CV%  | 3.0                       | 2.3     | 2.2   | 1.7                   | 1.9       | 1.9   | 4.0                     | 2.3     | 1.9  | 3.5                      | 2.6      | 2.7   |
| Combined   | Mean | 141.8                     | 213.5   | 315.6 | 107.0                 | 169.6     | 296.1 | 36.0                    | 52.3    | 79.6 | 85.1                     | 114.9    | 164.3 |
|            | SD   | 4.6                       | 4.2     | 6.0   | 3.2                   | 4.5       | 5.7   | 1.6                     | 1.9     | 2.1  | 4.9                      | 4.7      | 5.3   |
|            | CV%  | 3.3                       | 2.0     | 1.9   | 3.0                   | 2.7       | 2.0   | 4.5                     | 3.7     | 2.7  | 5.8                      | 4.3      | 3.2   |

**Supplemental Table 2** Interfering substance test results, showing highest concentration (mg/dL) eliciting no interference

| <b>Substance</b>            | <b>Drug name</b> | <b>TC</b>  | <b>TG</b>  | <b>HDL-C</b> | <b>ApoB</b> | <b>LDL-C</b> |
|-----------------------------|------------------|------------|------------|--------------|-------------|--------------|
| Bilirubin, unconj.          | —                | 20         | 20         | 20           | 20          | 21           |
| Bilirubin, conj.            | —                | 34         | 34         | 34           | 34          | 34           |
| Creatinine                  | —                | 5.5        | 5.5        | 5.5          | 5.5         | 5.5          |
| Hemoglobin                  | —                | 219        | 219        | 219          | 219         | 219          |
| Urea                        | —                | 263        | 263        | 263          | 263         | 263          |
| Uric acid                   | —                | 24         | 24         | 24           | 24          | 24           |
| Protein (albumin)           | —                | 5987       | 5987       | 7493         | 5986        | 7493         |
| Triglycerides (lipemic)     | —                | 500        | —          | 1135         | 633         | 508          |
| Atorvastatin                | Lipitor          | 4.9        | 4.9        | 4.9          | 4.9         | 4.9          |
| Fenofibrate                 | Tricor           | 4.5        | 4.5        | 4.6          | 4.5         | 4.5          |
| Acetylsalicylic acid        | Aspirin          | 66         | 66         | 66           | 66          | 66           |
| Acetaminophen               | Tylenol          | 20         | 20         | 20           | 20          | 20           |
| Naproxen sodium             | Aleve            | 42         | 56         | 28           | 28          | 28           |
| Ibuprofen sodium salt       | Advil            | 59         | 29         | 44           | 44          | 59           |
| Hydrochlorothiazide         | HCT              | 0.65       | 0.65       | 0.65         | 0.65        | 0.65         |
| Metoprolol tartrate         | Lopressor        | 1.5        | 1.5        | 1.5          | 1.5         | 1.5          |
| Nifedipine                  | Adalat           | 0.04       | 0.04       | 0.04         | 0.04        | 0.04         |
| Enalaprilat dihydrate       | Vasotec          | 0.04       | 0.04       | 0.04         | 0.04        | 0.04         |
| Hydralazine hydrochloride   | Apresoline       | 19         | 19         | 19           | 19          | 19           |
| Metformin hydrochloride     | Glucophage       | 65         | 65         | 65           | 65          | 65           |
| Salicylic acid              | —                | 61         | 61         | 61           | 61          | 61           |
| Clopidogrel hydrogensulfate | Plavix           | 18         | 18         | 18           | 9.5         | 18           |
| Furosemide                  | Lasix            | 6.3        | 6.3        | 6.3          | 6.3         | 6.3          |
| Glipizide                   | Glucotrol        | 0.23       | 0.23       | 0.23         | 0.23        | 0.23         |
| Heparin sodium              | Lovenox          | 303.5 U/dL | 303.5 U/dL | 303.5 U/dL   | 303.5 U/dL  | 303.5 U/dL   |
| Isosorbide dinitrate        | Isordil          | 0.02       | 0.02       | 0.02         | 0.02        | 0.02         |
| Menhaden oil                | Fish oil         | 241        | 241        | 242          | 241         | 241          |
| Acetylcysteine              | Acetadote        | —          | —          | —            | 125         | —            |
| Ampicillin                  | Principen        | —          | —          | —            | 6.1         | —            |
| Ascorbic acid               | Vitamin C        | —          | —          | —            | 6.2         | —            |
| Calcium dobesilate          | Doxium           | —          | —          | —            | 30          | —            |
| Cyclosporine                | Neoral           | —          | —          | —            | 6.1         | —            |
| Cefoxitin                   | Mefoxin          | —          | —          | —            | 70          | —            |
| Levodopa (L-DOPA)           | Lodosyn          | —          | —          | —            | 1.6         | —            |
| Methyldopa                  | Aldomet          | —          | —          | —            | 1.6         | —            |
| Metronidazole               | Flagyl           | —          | —          | —            | 12          | —            |
| Doxycycline                 | Doryx            | —          | —          | —            | 3.1         | —            |
| Rifampin (Rifampicin)       | Rifadin          | —          | —          | —            | 34          | —            |

**Supplemental Table 3** Comparison of ELP assay results from specimens collected in different tubes\*

| Analyte           | Tube type      | R <sup>2</sup> | Slope (SE)  | Intercept (SE) | Absolute Bias (mg/dL) | Mean %Bias |
|-------------------|----------------|----------------|-------------|----------------|-----------------------|------------|
| Total Cholesterol | Plain Serum    | 1.00           | 0.99 (0.00) | 5.86 (1.15)    | 2.9                   | 1.8        |
|                   | EDTA Plasma    | 1.00           | 0.98 (0.00) | 0.77 (1.19)    | -3.8                  | -1.8       |
|                   | Heparin Plasma | 1.00           | 0.98 (0.00) | 6.34 (1.15)    | 1.5                   | 1.3        |
| Triglycerides     | Plain Serum    | 1.00           | 0.97 (0.00) | 3.45 (0.97)    | -0.6                  | 0.3        |
|                   | EDTA Plasma    | 1.00           | 0.99 (0.01) | -4.46 (1.28)   | -6.7                  | -4.7       |
|                   | Heparin Plasma | 1.00           | 0.94 (0.00) | 4.30 (1.00)    | -4.9                  | -2.3       |
| HDL Cholesterol   | Plain Serum    | 1.00           | 0.99 (0.01) | 1.12 (0.61)    | 0.5                   | 1.0        |
|                   | EDTA Plasma    | 1.00           | 0.95 (0.01) | 1.55 (0.78)    | -1.4                  | -2.0       |
|                   | Heparin Plasma | 1.00           | 0.98 (0.01) | 1.42 (0.61)    | 0.1                   | 0.6        |
| ApoB              | Plain Serum    | 1.00           | 0.97 (0.00) | 4.17 (0.55)    | 1.1                   | 1.8        |
|                   | EDTA Plasma    | 1.00           | 0.96 (0.01) | 1.92 (0.87)    | -2.1                  | -1.3       |
|                   | Heparin Plasma | 1.00           | 0.96 (0.01) | 8.78 (0.79)    | 4.6                   | 6.2        |
| LDL Cholesterol   | Plain Serum    | 1.00           | 0.99 (0.00) | 3.54 (0.69)    | 2.3                   | 2.5        |
|                   | EDTA Plasma    | 1.00           | 0.99 (0.00) | 0.08 (0.79)    | -1.4                  | -1.0       |
|                   | Heparin Plasma | 1.00           | 0.98 (0.00) | 3.98 (0.80)    | 2.1                   | 2.9        |

\*Compared to Greiner tube.

**Supplemental Table 4.** Stability of ELP results by storage temperature and freeze-thaw cycles

| <b>Conditions</b>                       | <b>TC</b> | <b>TG</b> | <b>HDL-C</b> | <b>ApoB</b>          | <b>LDL-C</b>          |
|-----------------------------------------|-----------|-----------|--------------|----------------------|-----------------------|
| Controlled room temperature, 18 to 26°C | 7 days    | 7 days*   | 7 days       | 7 days               | 7 days                |
| Refrigerated, 2 to 8°C                  | 14 days   | 14 days   | 14 days      | 14 days              | 14 days               |
| Frozen, -25 to -10°C                    | 14 days   | 14 days   | 14 days      | 14 days              | 14 days               |
| Frozen, -70°C <sup>‡</sup>              | 6 years   | 6 years   | 6 years      | 6 years              | 6 years               |
| Freeze-thaw cycles                      | 5 cycles  | 5 cycles  | 5 cycles     | 1 cycle <sup>†</sup> | 5 cycles <sup>§</sup> |

Data shown are for serum specimens collected in Greiner tubes. Stability was the same in plain serum tubes, EDTA plasma tubes and Na-heparin tubes unless otherwise indicated. \*At controlled room temperature, TG was stable for 6 days in Na-heparin plasma tubes and 5 days in plain serum tubes; †ApoB was stable for 5 freeze-thaw cycles in Na-heparin plasma tubes, 4 cycles in plain serum tubes and 3 cycles in EDTA plasma tubes; §LDL-C was stable for 4 cycles in EDTA plasma tubes. <sup>‡</sup>No data available for other collection tube types.
